1

2

3

4 **Cryo-ET reveals nucleosome reorganization in condensed mitotic**  
5 **chromosomes *in vivo***

6

7

8 Shujun Cai, Chen Chen, Zhi Yang Tan, Jian Shi, and Lu Gan\*

9

10 Department of Biological Sciences and Centre for BiImaging Sciences, National  
11 University of Singapore, Singapore 117543

12

13 \* Correspondence: [lu@anaphase.org](mailto:lu@anaphase.org)

## 14 **SUMMARY**

15 At the onset of mitosis, chromosomes condense into discrete bodies. This  
16 transformation involves rearrangement at the nucleosome level and has consequences  
17 for transcription, but the details remain unclear. Here, we use cryo-electron tomography  
18 to determine the 3-D arrangement of nucleosomes and other large nuclear features in  
19 interphase and mitotic fission yeast cells. Nucleosomes can form heterogenous clusters  
20 in both interphase and mitotic cells, but none the size of a Hi-C domain. Furthermore,  
21 the nucleosomes are mingled with two features: nucleosome-free pockets and  
22 ribosome-sized “megacomplexes”. Compared to interphase chromatin, the  
23 nucleosomes in mitotic chromatin pack in larger clusters. Furthermore, mitotic chromatin  
24 contained fewer megacomplexes. However, nearest-neighbor distance analysis  
25 revealed that mitotic nucleosome clusters have the same packing density as in  
26 interphase. Therefore, the uneven chromosome condensation helps explain a  
27 longstanding enigma of mitosis: most genes are silenced but a subset is upregulated.

## 28 INTRODUCTION

29 Chromatin structure influences key nuclear activities such as transcription and  
30 replication (Dixon et al., 2016). The fundamental unit of chromatin is the nucleosome,  
31 which consists of ~147 bp of DNA wrapped around a histone octamer (Luger et al.,  
32 1997). In mammalian cells, 2 - 35 nucleosomes pack into heterogeneous “clutches”  
33 (Ricci et al., 2015) and more than 500 nucleosomes associate as topologically  
34 associating domains (Dixon et al., 2012). Likewise, in the fission yeast  
35 *Schizosaccharomyces pombe*, between 300 - 700 nucleosomes associate as compact  
36 globular chromatin bodies called globules (Mizuguchi et al., 2014). These studies  
37 suggest that chromatin higher-order structure arises from physical interactions of large  
38 groups of nucleosomes.

39 In mitotic cells, chromosomes condense into discrete chromatids. The factors  
40 involved in condensation have been well characterized (Hirano, 2016) and a number of  
41 models have been proposed for the large-scale organization of chromatin domains  
42 (Maeshima and Eltsov, 2008). However, the molecular details of chromatin  
43 reorganisation are still unknown. Knowledge of how chromatin condenses in 3-D at the  
44 single-nucleosomes level is needed to explain the nearly global mitotic transcriptional  
45 repression observed in many eukaryotes (Struhl, 1998). Likewise, a 3-D model of  
46 chromatin could also explain how a subset of genes escape this mitotic repression and  
47 get upregulated (Rustici et al., 2004; Oliva et al., 2005; Peng et al., 2005).

48 Some insights on *in vivo* chromatin organisation were made possible by new  
49 methods, including chromatin-conformation capture (Hi-C), super-resolution  
50 microscopy, and traditional EM of cells stained with DNA-proximal osmium (Beliveau et

51 al., 2015; Pombo and Dillon, 2015; Ou et al., 2017). However, the resultant models are  
52 limited because these methods rely on population-averaged data, or have low  
53 resolution, or perturb the sample due to the fixation, dehydration and staining  
54 perturbations, respectively. Electron cryotomography (cryo-ET) complements these  
55 approaches because it enables direct visualization of macromolecular complexes in a  
56 life-like frozen-hydrated state inside cells in 3-D at ~ 4-nm resolution (Gan et al., 2013).  
57 Being a label-free method, cryo-ET image features arise from the molecules  
58 themselves, revealing the positions of all macromolecular complexes in a cell. Using  
59 cryo-ET, we previously showed that nucleosomes in picoplankton and budding yeast  
60 pack irregularly, but we also found that the chromosomes in these cells did not compact  
61 into discrete chromatids (Gan et al., 2013; Chen et al., 2016).

62 We have now used cryo-ET to directly visualize the mitotically rearranged  
63 chromatin *in vivo* in the fission yeasts *S. pombe* and *S. japonicus*. To obtain  
64 cryotomograms with sufficient contrast to resolve nucleosomes, we imaged cells that  
65 were thinned by cryomicrotomy. To better understand the heterogeneous complexes in  
66 the crowded nucleoplasm, we took advantage of recent advances in phase-contrast  
67 hardware and 3-D classification software (Bharat and Scheres, 2016; Khoshouei et al.,  
68 2017). We found that in interphase, nucleosomes frequently associate as small clusters  
69 or short chains. Nucleosome-free pockets and megadalton-sized “megacomplexes” are  
70 interspersed among these nucleosome clusters. In mitosis, chromosomes condense  
71 unevenly and have slightly larger nucleosome clusters. Mitotic chromosomes also have  
72 nucleosome-free pockets, but fewer megacomplexes. These phenotypes are conserved

- 73 in both yeasts and lead to a model that explains how mitotic chromatin is permissive to
- 74 some genes but repressive to most others.

## 75 RESULTS

### 76 ***S. pombe* subcellular structures are revealed at molecular resolution by cryo-ET**

77 To understand how native chromatin organization differs between interphase and  
78 mitosis, we imaged *S. pombe* cells by cryo-ET of frozen-hydrated sections  
79 (cryosections, ~ 90 - 130 nm nominal thickness). Because it is challenging to determine  
80 the cell-cycle stage using the cryo-EM image alone, we arrested temperature-sensitive  
81 *cdc25-22* cells in G2 phase (Fantes, 1979) and cold-sensitive *nda3-KM311* cells in  
82 prometaphase (Hiraoka et al., 1984). Fluorescence microscopy confirmed that the latter  
83 cells have the well-known mitotic chromosome-condensation phenotype (Fig. 1A).

84 In a typical cryotomogram of an *S. pombe* cell, we could recognize organelles by  
85 their size and membrane morphology. Prominent organelles included the endoplasmic  
86 reticulum, vesicles, and the nucleus (Fig. 1B and C). To further assess the quality of the  
87 cryosections and data, we performed subtomogram averaging of cytoplasmic ribosomes  
88 (Fig. S1A, B). The resulting average was similar to a low-pass-filtered budding-yeast  
89 ribosome crystal structure (Fig. S1C) (Ben-Shem et al., 2011). Therefore, the  
90 conformation of large complexes are preserved at the molecular level.

91

### 92 **Interphase chromatin is arranged as loosely packed nucleosomes and** 93 **heterogeneous nucleosome clusters**

94 G2-phase cell nuclei are filled with many nucleosome-like granular densities, which, for  
95 the sake of brevity, herein we call nucleosomes for brevity due to their size, shape,  
96 abundance, location, and condensation phenotype all being consistent with  
97 nucleosomes (see below). Nucleosomes frequently associate as small heterogeneous

98 clusters less than 50-nm wide (Fig. 2B). Chain-like nucleosome configurations are also  
99 abundant (Fig. 2C). The remaining nucleosomes are not clustered together (Fig. 2D).  
100 Efforts to automatically identify clusters of nucleosomes did not produce clusters with  
101 distinct motifs due to their heterogeneous positions. Small nucleosome-free “pockets” (<  
102 50 nm) are also abundant (Fig. 2E). Densities much larger than nucleosomes (> 20 nm)  
103 are spread throughout the nucleus (Fig. 2F). These densities are consistent with being  
104 multi-megadalton nuclear assemblies such as pre-ribosomes, spliceosomes, and  
105 transcription preinitiation complexes (Gleizes et al., 2001; Allen and Taatjes, 2015;  
106 Oesterreich et al., 2016); we call these “megacomplexes” for brevity. Therefore, in  
107 interphase, nucleosomes associate into many heterogeneous small clusters,  
108 interspersed among pockets and megacomplexes.

109

### 110 **Condensed mitotic chromosomes contain fewer megacomplexes**

111 Unlike in G2-phase cells, in each cryotomogram of a prometaphase cell we found a  
112 single position that has many features consistent with its being a section through a  
113 condensed chromosome. For example, nucleosomes-like densities are abundant within  
114 these positions, but much rarer outside (Fig. 3A-C). Compared to G2-phase cells, in  
115 which abundant megacomplexes are interspersed with the chromatin (Fig. 2A),  
116 megacomplexes are mostly absent from these large contiguous regions in  
117 prometaphase cells (Fig. 3A). These positions are hundreds of nanometers wide,  
118 matching the size of condensed chromosomes seen by fluorescence microscopy (Fig.  
119 1A, S2). If these positions are indeed chromosomes, there should be a large contiguous  
120 volume in the cell with few megacomplexes. To test this hypothesis, we sampled a

121 larger nuclear volume by cryo-ET of 5 nearly sequential cryosections (summing to ~ 700  
122 nm thick) of the same cell (Fig. S3A). We saw a single megacomplex-poor region in  
123 each of these cryosections, which is consistent with these positions being sections  
124 through one or two of the three fission-yeast chromosomes (Fig. S3B-F). Taken  
125 together, we located mitotic chromosomes and found they have fewer megacomplexes  
126 within.

127

128 **Nucleosome clusters and loosely packed nucleosomes also coexist within mitotic**  
129 **condensed chromosomes**

130 In conventional (defocus) cryotomograms, we noticed that most nucleosomes appear  
131 more densely packed in prometaphase cells (Fig. S4). To better understand how  
132 chromatin is organized, we imaged cells by Volta phase contrast cryo-ET (Fig. S5).  
133 Volta cryo-EM data have much more contrast, making it possible to locate and  
134 determine the orientations of smaller protein complexes and to resolve protein  
135 complexes packed to near-crystalline density inside of cells (Engel et al., 2015;  
136 Khoshouei et al., 2017). The Volta data confirmed what we learned from defocus cryo-  
137 ET: nucleosomes more frequently packed into larger clusters in prometaphase cells  
138 than in the G2-phase cells, but the boundary of clusters is less clear (Figs. 4A and B,  
139 S5). Importantly, we also observed some loosely packed nucleosomes in prometaphase  
140 cells (Figs. 4C and S5B, D), meaning that condensation is uneven. In summary, mitotic  
141 chromosomes consist of both densely and loosely packed nucleosomes.

142 The existence of loosely packed prometaphase nucleosomes suggests that  
143 mitotic chromatin is permissive to transcriptional machines, which is supported by the



144 observation that some genes are up-regulated during mitosis (Rustici et al., 2004; Oliva  
145 et al., 2005; Peng et al., 2005). However, these earlier studies could not determine if  
146 mitotic cells are undergoing active RNA polymerase II transcription or if they simply  
147 have stable mRNAs leftover from G2 phase. Phosphorylation of RNA polymerase II at  
148 Serine 2 of the carboxy-terminal domain (CTD) heptamer repeat is a conserved marker  
149 of transcription elongation (Komarnitsky et al., 2000; Harlen and Churchman, 2017).  
150 Using immunofluorescence, we confirmed the existence of RNA polymerase II with  
151 phospho-Ser2 CTD, and therefore active transcription, in prometaphase chromosomes  
152 (Fig. S6). To rule out the possibility of abnormal transcriptional activity in the mutants,  
153 we also performed this experiment in asynchronous wild type cells. We also detected  
154 phospho-Ser2 CTD signal in early mitotic cells. Therefore, transcription is not shut-down  
155 globally in mitotic *S. pombe* cells.

156 To analyse the nucleosome rearrangement more objectively, we performed  
157 template matching to find their 3-D positions in Volta cryotomograms. This analysis  
158 showed that nucleosome formed clusters in both G2-phase and prometaphase cells, but  
159 appear more crowded in the latter (Fig. 5A, B). If chromosomes condense via a uniform  
160 accretion of all nucleosomes, the average nucleosome nearest-neighbor distance  
161 (NND) distribution should shorten. However, the NND distributions of nucleosome hits in  
162 G2-phase and prometaphase cells were indistinguishable (two-tailed t-test,  $p > 0.05$ )  
163 (Fig. 5C). While mitotic chromatin might not condense by compaction of nearest-  
164 neighbor nucleosomes, they might condense from changes in interactions between  
165 groups of nucleosomes. We tested this hypothesis by creating histograms of 10<sup>th</sup> NNDs  
166 and found that the population shifted to shorter distances in prometaphase cells (two-

167 tailed t-test,  $p < 0.001$ ) (Fig. 5D), which explains the more-crowded appearance of  
168 prometaphase nucleosomes. Taken together, our analyses reveal that chromosomes  
169 condense by the merging of small nucleosome clusters, resulting in a closer association  
170 between distant nucleosomes (Fig. 5E, F).

171 As an alternative approach to studying nucleosomes *in vivo*, we performed cryo-  
172 ET on the undigested chromatin from lysates of G2-phase and prometaphase *S. pombe*  
173 cells. Cryotomograms of cell lysis products can reveal more clearly the positions of  
174 nucleosomes (Cai et al., 2017). Subtomogram averages of nucleosome template-  
175 matching hits revealed unambiguous features of mono-nucleosomes including the  
176 groove between two DNA gyres (Fig. S7), demonstrating that our template-matching  
177 approach can pick out most nucleosomes. In the lysates, there are many large  
178 nucleosome-free pockets wider than 50 nm in G2-phase chromatin. In contrast,  
179 prometaphase chromatin remained as compact bodies with only a few smaller pockets  
180 (Fig. S8). Therefore, consistent with our *in vivo* results, prometaphase chromatin also  
181 has denser nucleosome packing *in vitro* (Fig. S8).

182

### 183 ***S. japonicus* and *S. pombe* chromosomes condense by similar means**

184 To test whether the formation of larger nucleosome clusters during condensation is  
185 conserved, we imaged *S. japonicus*, a bigger fission yeast that also undergoes mitotic  
186 condensation (Robinow and Hyams, 1989). *S. japonicus* has the same genome size (~  
187 12Mb) as *S. pombe*, but has a nucleus at least 8-fold more voluminous. Because *S.*  
188 *japonicus* is a less-developed model organism, we used asynchronous wild-type cells.  
189 These cells were frozen, cryosectioned, and subjected to Volta cryo-ET just like for *S.*

190 *pombe*. We used microtubules as cytological markers because a previous study  
191 showed that cells that have cytoplasmic microtubules are in interphase, whereas cells  
192 that have nuclear microtubules are in mitosis (Yam et al., 2013). We found densely  
193 packed nucleosomes in *S. japonicus* mitotic chromosomes (Fig. S9A-D). Furthermore,  
194 NND and 10<sup>th</sup>-NND analyses show that the nucleosome NND distributions were similar  
195 in interphase and mitosis (two-tailed t-test,  $p > 0.05$ ), but that the 10<sup>th</sup>-NND distribution  
196 was shorter in mitosis (two-tailed t-test,  $p < 0.001$ ) (Fig. S9E, F). Therefore, the  
197 formation of larger and closer nucleosome clusters in mitosis is a conserved phenotype  
198 in fission yeasts.

199

#### 200 **Nucleosomes do not packed in a fixed motif**

201 Our previous study on natural *S. cerevisiae* chromatin *in vitro* showed that pairs of  
202 nucleosomes sometimes packed face-to-face (Cai et al., 2017), which can limit access  
203 to histone motifs like the acidic patch (Luger et al., 1997). However, our 2-D  
204 classification of di-nucleosomes in *S. pombe* did not reveal any classes containing face-  
205 to-face-packed nucleosomes (Fig. S11), meaning that such nucleosome-nucleosome  
206 interactions must be extremely rare. Instead, di-nucleosomes were packed irregularly,  
207 including edge-to-edge packing, with ~ 3-nm gaps in between. Compared with  
208 prometaphase cells (Fig S11B and D), we noticed that G2-phase nucleosomes were  
209 more heterogeneously packed (Fig. S11A and C). Taken together, our 2-D classification  
210 analyses reveal irregular packing of nucleosomes *in vivo*.

211

212 **A subset of nucleosomes may be partially unwrapped**

213 In a rare instances, we were able to resolve densities that resemble linker DNA  
214 spanning two nucleosome-like densities in *S. pombe* G2-phase chromatin (Fig. S10A,  
215 B). Many of these linker-DNA-like densities were much longer than the average ~ 2 nm  
216 expected from MNase-digestion experiments (Fig. S10A-D) and nucleosome-mapping  
217 studies (Lantermann et al., 2010). Furthermore, in the NND analysis, there are a large  
218 number of nucleosome pairs that have NND values greater than 12 nm, i.e., the gap  
219 between two adjacent nucleosomes are larger than 2 nm (Fig. 5C). One explanation is  
220 that the larger separation reflects the high end of the distribution of linker DNA lengths.  
221 Alternatively, some nucleosomes might be partially unwrapped – such as may be  
222 expected of fragile or prenucleosomes (Fei et al., 2015; Kubik et al., 2015), resulting in  
223 apparently longer linker DNA (Fig. S10E, F). The possibility of partially unwrapped  
224 nucleosomes led us to test whether the nucleosomes *in vivo* resembled  
225 mononucleosomes. To do this, we performed 2-D and 3-D classification of nucleosome  
226 template-matching hits (Bharat and Scheres, 2016). Although 3-D class averages have  
227 the correct size of nucleosomes, none of them resemble the low-pass-filtered crystal  
228 structure of the mono-nucleosome (Fig. S12) (Luger et al., 1997). This difference might  
229 be due to either the insufficient signal-to-noise ratio of our dataset or high heterogeneity  
230 of nucleosome densities.

## 231 DISCUSSION

232 We have directly visualized chromatin in both interphase and mitotic fission-yeast cells  
233 by cryo-ET. Nucleosomes associate into small heterogeneous clusters in interphase.  
234 Mitotic cells have larger nucleosome clusters, but the nearest-neighbor distance does  
235 not shorten. Condensed chromosomes also contain fewer megacomplexes. Following  
236 cell lysis, mitotic chromatin remains more compact than interphase chromatin,  
237 suggesting that mitotic chromatin has properties that make it inherently prone to self-  
238 association. Classification analysis suggests that contrary to universal depictions in the  
239 literature, most nucleosomes *in vivo* are conformationally heterogeneous or bound by  
240 nucleosome-associated proteins, or both. We propose a model of chromosome  
241 condensation at the nucleosome level (Fig. 6). In uncondensed chromosomes,  
242 nucleosomes are loosely packed as small and heterogeneous clusters. Upon mitotic  
243 condensation, a subset of nucleosomes become part of large clusters. As a result of this  
244 chromatin reorganization, megacomplexes become mostly absent from the chromatin.

245 A recent electron tomography study (ChromEMT) showed that mammalian  
246 chromatin could be better visualized when treated with a DNA-binding dye that  
247 generates a local cloud of osmiophilic polymers (Ou et al., 2017). In that study, the cells  
248 were processed by traditional EM methods, meaning that recorded densities were from  
249 osmium deposits in a cell that had been subjected to dehydration, multiple rounds of  
250 chemical fixation, and plastic embedment. Assuming that the osmium stain distribution  
251 remained localized within a few nanometers of the original nucleosome positions, the  
252 study concluded that mammalian chromatin is best explained by a beads-on-a-string  
253 configuration, and that chromosomes condense by these beads folding back upon

254 themselves. Unlike our study, the ChromEMT study did not report any clusters of  
255 nucleosomes or any mega-complexes. Instead, the space in between the stained  
256 positions appeared like large voids.

257

### 258 **Cryo-ET reveals new insights into higher-order chromatin organisation**

259 Our cryotomograms of G2 phase *S. pombe* reveal that at the single-cell level, there are  
260 many small heterogeneous clusters (Fig. 2D). However, most clusters are smaller than  
261 the globules inferred from Hi-C experiments (Mizuguchi et al., 2014). This inconsistency  
262 between single-cell and population studies has been reported before -- single-cell Hi-C  
263 studies showed smaller or more dispersed chromatin bodies than conventional  
264 (population based) Hi-C studies (Nagano et al., 2013; Flyamer et al., 2017; Nagano et  
265 al., 2017). In light of our direct observation of nucleosome clusters, this difference can  
266 be reconciled as follows. Each cell has different sets of small nucleosome clusters,  
267 probably as a consequence of chromatin dynamics (Nozaki et al., 2017). A large  
268 population of cells, each with a smaller cluster of nucleosomes at a given locus, could  
269 produce the larger globule if their Hi-C signals were summed (Fig. S13). Therefore,  
270 small heterogeneous nucleosome clusters are the primary higher-order structure of  
271 chromatin in fission yeast.

272 In higher eukaryotes, nucleosome arrays are also thought to fold into chromatin  
273 loops, which in human cells can bring together loci that are separated by up to 2 Mb that  
274 correspond to ~10,000 nucleosomes (Rao et al., 2014). Hi-C did not reveal any loops in  
275 *S. pombe* (Mizuguchi et al., 2014), but we do see curved nucleosome chains, which  
276 might be portions of short loops (Fig. 2C). If these chains were indeed portions of loops,

277 their loop-like Hi-C signature (off-axis peaks) could have been lost due to the  
278 aforementioned population averaging effect or due to insufficient Hi-C resolution. It is  
279 unknown if short chromatin loops adopt a “ $\Omega$ ” shape or if they are irregular. Such a  
280 question may eventually be addressable once imaging technology improves to a point  
281 where the majority of linker DNAs connecting sequential nucleosomes can be resolved  
282 in frozen-hydrated cells.

283

#### 284 **The role of uneven condensation in transcriptional regulation**

285 It has long been known that there is a strong correlation between chromosome  
286 condensation and transcriptional repression (Taylor, 1960; Prescott and Bender, 1962).  
287 Mechanistic evidence of mitotic repression came from the observation that mitotic  
288 condensation is coincident with transcription-factor displacement (Martinez-Balbas et  
289 al., 1995). In fission yeast, there is an overall transcriptional repression in mitosis (Oliva  
290 et al., 2005), but many cell-cycle related genes actually get upregulated during mitosis  
291 (Rustici et al., 2004; Oliva et al., 2005; Peng et al., 2005). In agreement, our  
292 immunofluorescence images detected elongating RNA polymerase II in mitotic S.  
293 *pombe* chromosomes. How could such an enigma be explained? Our study shows that  
294 most nucleosomes in mitotic chromosomes do not pack face-to-face, which enables  
295 access to a subset of protein complexes that interact with this nucleosome interphase  
296 (McGinty and Tan, 2015). Mitotic fission yeast nucleosomes are nevertheless densely  
297 packed and generally non-permissive to mega-complexes, including large transcription  
298 machines. However, we find that condensation is uneven because there are a few  
299 nucleosome-free positions in between nucleosome clusters (Figs. 4C, S5D). These

300 positions would remain permissive to either the passage or assembly of transcription  
301 megacomplexes such as spliceosomes and transcription preinitiation complexes.  
302 Indeed, a few other nucleosome-free positions in mitotic chromatin contain  
303 megacomplexes, but it remains to be determined whether these were pre-formed  
304 complexes that diffused into an already-condensed chromosome or if they assembled  
305 *de novo*. We favor this latter possibility because the subunits of megacomplexes, which  
306 are much smaller, can pass between the nucleosomes due to transient opening of  
307 chromatin from thermal motions (Hihara et al., 2012). Uneven condensation therefore  
308 offers a molecular explanation for the fine-grained control of mitotic transcription.



## 309 **METERIALS AND METHODS**

310

### 311 **Cell culture**

312 *S. pombe* cell culture (Forsburg, 2003), G2-phase arrest (Ducommun et al., 1990) and  
313 prometaphase arrest (Hiraoka et al., 1984) were performed as previously reported. *nda3-km311*  
314 cells were incubated overnight in yeast-extract supplemented (YES) medium (30 g/L glucose, 5  
315 g/L yeast extract, 225 mg/L adenine, 225 mg/L histidine, 225 mg/L leucine, 225 mg/L uracil) at  
316 30°C with shaking. When the optical density at 600 nm (OD<sub>600</sub>) reached ~0.2, the cultures were  
317 cooled by incubation in a 20°C shaker. After incubation with shaking for 10 hr at this lower  
318 temperature, above 90% of cells were arrested in a prometaphase state. *cdc25-22* cells were  
319 incubated in YES medium at 25°C with shaking overnight. When the OD<sub>600</sub> reached ~0.2, the  
320 cultures were warmed to a 36°C in a water bath and then transferred to a 36°C shaker. After 4  
321 hr, the majority of cells were arrested at G2 phase. *S. japonicus* cells were cultured in YES  
322 medium at 30°C with shaking overnight until cells reached mid-log phase (OD<sub>600</sub> = ~0.6) (Yam  
323 et al., 2013).

324

### 325 **Fluorescence microscopy**

326 Cells were stained with DAPI following a published protocol (Toda et al., 1981). Cells (1 ml)  
327 were fixed with 2.5% formaldehyde for 60 mins at the restrictive temperature for mutants. The  
328 cells were washed twice by centrifugation at 1500 x g for 1 min and resuspension with distilled  
329 water. They were pelleted at 1500 x g for 1 min and stained by resuspension in 50 µl PBS, pH  
330 7.4, containing 1 µg/ml DAPI. Ten µl of the sample was then added to the slide and imaged  
331 using a PerkinElmer Ultraview Vox Spinning Disc confocal microscope (PerkinElmer, Waltham,  
332 MA). Images were recorded using an 100x oil-immersion objective.

333

### 334 **Immunofluorescence**

335 Log-phase cells (~10 ml) were fixed with 3.7% formaldehyde for 90 min at 30°C (or the  
336 restrictive temperature for mutants). Cells were collected by centrifugation at 1500 x g for 5 min.  
337 Cells were then resuspended in 1 ml PEM buffer (0.1 M PIPES pH 6.95, 2 mM EGTA, 1 mM  
338 MgSO<sub>4</sub>). Cells were washed once with 1 ml PEM this way and then resuspended in 1ml PEMS  
339 (1.2 M sorbitol in PEM). Next, cells were spheroplasted for 15 minutes by incubation with lysis-  
340 enzyme cocktail, diluted 1:1000 in PEMS at 30°C. Cells were washed with PEMS. The pellet  
341 was then resuspended in PEMS with 1% Triton X-100 and incubated at 22°C for 5 min. Cells  
342 were then washed twice with PEM and incubated in PEMBAL (PEM, 1% BSA, 100 mM L-Lysine  
343 hydrochloride) at 22 °C for 1 hour. Cells were then incubated with rabbit anti-RNA polymerase II  
344 CTD repeat YSPTSPS (phospho S2) antibody in PEMBAL (1:1000 dilution) at 22 °C for 1 hour.  
345 Cells were washed three times with 1 ml PEMBAL and then incubated with Alexa Fluor 488-  
346 coupled donkey anti-rabbit antibodies at 22 °C for 1 hour. Cells were then washed three times  
347 with PEM and resuspended in 50 µl 1 µg/ml DAPI.

348

### 349 **Self-pressurized freezing**

350 Self-pressurized freezing was performed based on a previous method, with modifications  
351 (Yakovlev and Downing, 2011). *S. pombe* were grown in YES medium until the OD<sub>600</sub> reached  
352 0.2 - 0.6. Cells were pelleted by centrifuging at 1500 x g for 5 min. Dextran (40 kDa) was added  
353 to the cell pellet as an extracellular cryoprotectant to a final concentration of 30%. The cells  
354 were then quick-spun to remove bubbles and then loaded into a copper tube (0.45 / 0.3 mm  
355 outer / inner diameters) with a syringe-type filler device (Part 733-1, Engineering Office M.  
356 Wohlwend GmbH). The tube was sealed by crimping both ends with flat jaw pliers. The sealed  
357 tube was held horizontally 3 cm above the liquid-ethane cryogen surface, and then dropped into

358 the cryogen. The flattened ends of the tube were then cut off with a specially designed guillotine  
359 under liquid nitrogen.

360

### 361 **Vitreous sectioning**

362 Vitreous sectioning was performed as previously described with modifications (Chen et al.,  
363 2016). A perforated-carbon grid or continuous carbon grid was coated with 10 nm gold colloids  
364 as fiducials for cryotomographic alignment. Gold solution (5  $\mu$ l at  $5.7 \times 10^{12}$  particles/ml) in 0.1  
365 mg/ml BSA was applied to the grid and then air-dried. Frozen-hydrated cells were cut into a 70-  
366 nm thick cryo-ribbon using a 35° diamond knife (Cryo35, Diatome, Nidau, Switzerland) in a  
367 Leica UC7/FC7 cryo-ultramicrotome (Leica Microsystems, Vienna, Austria) at -150°C. Once the  
368 ribbon was ~3 mm long, the colloidal-gold-coated EM grid was placed underneath the ribbon.  
369 To minimize occlusion by grid bars at high tilt during cryotomographic imaging, the grid as  
370 aligned so that the ribbon was parallel with and in between the grid bars. The ribbon was then  
371 attached to the grid by operating the Crion in “charge” mode for ~30 seconds. The grid was  
372 stored in liquid nitrogen until imaging.

373

### 374 **Cell lysis**

375 Log-phase *S. pombe* cells were collected by centrifuging at 1500 x *g* for 5 min and then  
376 spheroplasted for 15 minutes by incubation with lysis-enzyme cocktail at either 30°C or the  
377 restrictive temperature for mutants. The spheroplasts were pelleted at 1500 x *g* for 2 mins at 22  
378 °C and then lysed in 20  $\mu$ l lysis buffer (50 mM EDTA and a 1:1000 dilution of protease inhibitor  
379 cocktail) on ice for 15 min.

380

### 381 **Plunge freezing**

382 Plunge freezing was done using a Vitrobot Mk IV (Thermo, Waltham, MA) operated at 4°C with  
383 80% humidity. *S. pombe* cell lysates (4  $\mu$ l) were applied to a freshly glow-discharged perforated-

384 carbon grid. The grid was blotted once (blot force:1, blot time: 3s) with filter paper and then  
385 plunged into liquid ethane.

386

### 387 **Electron cryotomography**

388 Tilt series were collected using FEI TOMO4 on a Titan Krios cryo-TEM (Thermo, Waltham, MA)  
389 operated at 300 KeV and equipped with a field-emission gun, a Volta phase-plate device, and a  
390 Falcon II direct-detection camera. Details of the imaging parameters are shown in Table S1.  
391 Image alignment, CTF correction, low-pass filtration, 3-D reconstruction were done using the  
392 IMOD software package. Note that Volta cryotomograms were not CTF corrected.

393 Cryotomograms were visualized as tomographic slices with 3dmod and as isosurfaces with  
394 UCSF Chimera.

395

### 396 **Template matching**

397 Template matching was done using PEET. A manually-selected subtomogram containing a  
398 nucleosome-like particle served as a template. This template was multiplied with a spherical  
399 mask to suppress the influence of background nucleoplasmic densities. The search grid with a  
400 10-nm spacing was generated within the nucleus. Hits within 6 nm were considered as  
401 duplicates and the extra hit was automatically removed. The criteria of cross-correlation  
402 coefficient cutoff were the same as in our previous report (Cai et al., 2017). Briefly, we first used  
403 the average of cross-correlation coefficients of all template-matching hits as a cutoff. We then  
404 manually inspected the hits in the tomogram and adjusted the cutoff (if needed) to minimize the  
405 number of detectable false positives and false negatives. To further remove false positives from  
406 megacomplexes, another round of template matching was performed using a ribosome-like  
407 density as a template. The nucleosome hits that were within 12.5 nm of these megacomplexes  
408 were then removed with a Matlab script (available upon request; Mathworks, Natick, MA).

409 For dinucleosome template matching, a manually-selected subtomogram of a di-  
410 nucleosome served as a template. This template was multiplied with a cylindrical mask  
411 (diameter: 15 nm, height: 22 nm) rotated to align with the longitudinal axis of the dinucleosome  
412 template. The search grid with a 25-nm spacing was generated within the chromatin. Due to  
413 missing wedge artifact, nucleosomes have higher resolution in X-Y. Therefore, the angular  
414 search around the X and Y axes was disabled. Hits within 15 nm were considered as duplicates.  
415 The criteria of cross-correlation coefficient cutoff were the same as the one described above for  
416 mononucleosomes. False positives from megacomplexes fell into their own classes in the  
417 subsequent 2-D classification (see below) and were removed at that point.

418

#### 419 **2-D and 3-D classification**

420 Subtomogram classification and 3-D averaging of nucleosomes were done in RELION 1.4 and  
421 RELION 2.0, following the workflow of our previous study (Cai et al., 2017). The 3-D coordinates  
422 of template-matching hits were imported into RELION with a 15.6 nm box size and 13.5 nm  
423 mask diameter. For 2-D classification, the number of classes was set to 50 and the resolution of  
424 the data was limited to 3 nm. All nucleosome-like classes were selected. For 3-D classification,  
425 the number of classes was set to between 10 and 20, and the resolution limit was set to 2 nm.  
426 Two to three rounds of 3-D classification were performed, with false positive removal in between  
427 rounds.

428 For di-nucleosome 2-D classification, the box size and the mask diameter were set to 30  
429 nm and 26 nm, respectively. As a default setting, RELION produce projections of all densities  
430 within the boxes, including the nucleoplasmic densities above and below dinucleosomes. To  
431 only include densities of dinucleosomes, a python script (available upon request) was used to  
432 generate projections from thinner boxes (height: 17.5 nm). The resolution of the data was  
433 limited to 2 nm to suppress the effects of high-resolution noise. The number of classes was set  
434 to 100, but many of the classes were very similar and therefore merged.

435

436 **Nearest-neighbor distance analysis**

437 Nearest-neighbor distance analysis of template-matching hits (Figs. 5 and S9) was performed  
438 as previously described (Cai et al., 2017). The coordinates of the nucleosome hits were  
439 imported into Matlab. NND and 10<sup>th</sup> NND were calculated using the Matlab function  
440 `nearestneighbour.m`. The script is available upon request.

441

442 **Two-tailed t-test**

443 Two-tailed t-tests for NND values were performed in Excel using TTEST function. The number  
444 of NND values analysed for G2-phase and prometaphase *S. pombe*, interphase and mitotic *S.*  
445 *japonicus* were 10292, 11835, 9397, 4474, respectively.

446

447 **Data sharing**

448 A cryotomogram, corresponding to Fig. 1, was deposited in the EMDataBank as EMD-####.  
449 The tilt series for all cryotomograms presented in this manuscript were deposited in the Electron  
450 Microscopy Public Image Archive as EMPIAR-####.

451

452 **Acknowledgements**

453 We thank the CBIS microscopy staff for support and training. We thank Mohan  
454 Balasubramanian and Yinyi Huang for providing *S. pombe* strains and advice on *S.*  
455 *pombe* culture. We thank Snezhka Oliferenko for advice on *S. japonicus* culture and  
456 manuscript feedback. *S. japonicus* strains were obtained from JapoNet. SC, CC, ZYT  
457 and LG were supported by NUS startups R-154-000-515-133, R-154-000-524-651, and  
458 D-E12-303-154-217, R-154-000-558-133, and MOE T2 R-154-000-624-112.

459

460 **Contributions**

461 S.C - experiments, project design, writing, CC - training, ZT - experiments, JS - training,  
462 LG - project design, writing.

463 **REFERENCES**

464 Allen, B.L., and Taatjes, D.J. (2015). The Mediator complex: a central integrator of transcription.  
465 Nature reviews Molecular cell biology 16, 155-166.

466 Beliveau, B.J., Boettiger, A.N., Avendano, M.S., Jungmann, R., McCole, R.B., Joyce, E.F., Kim-  
467 Kiselak, C., Bantignies, F., Fonseka, C.Y., Erceg, J., *et al.* (2015). Single-molecule super-  
468 resolution imaging of chromosomes and in situ haplotype visualization using Oligopaint FISH  
469 probes. Nature communications 6, 7147.

470 Ben-Shem, A., Garreau de Loubresse, N., Melnikov, S., Jenner, L., Yusupova, G., and  
471 Yusupov, M. (2011). The structure of the eukaryotic ribosome at 3.0 A resolution. Science 334,  
472 1524-1529.

473 Bharat, T.A., and Scheres, S.H. (2016). Resolving macromolecular structures from electron  
474 cryo-tomography data using subtomogram averaging in RELION. Nat Protoc 11, 2054-2065.

475 Cai, S., Song, Y., Chen, C., Shi, J., and Gan, L. (2017). Natural Chromatin Is Heterogeneous  
476 And Self Associates In Vitro. bioRxiv, 139543.

477 Chen, C., Lim, H.H., Shi, J., Tamura, S., Maeshima, K., Surana, U., and Gan, L. (2016).  
478 Budding yeast chromatin is dispersed in a crowded nucleoplasm in vivo. Molecular biology of  
479 the cell 27, 3357-3368.

480 Dixon, J.R., Gorkin, D.U., and Ren, B. (2016). Chromatin Domains: The Unit of Chromosome  
481 Organization. Molecular cell 62, 668-680.



- 482 Dixon, J.R., Selvaraj, S., Yue, F., Kim, A., Li, Y., Shen, Y., Hu, M., Liu, J.S., and Ren, B. (2012).  
483 Topological domains in mammalian genomes identified by analysis of chromatin interactions.  
484 *Nature* 485, 376-380.
- 485 Ducommun, B., Draetta, G., Young, P., and Beach, D. (1990). Fission yeast *cdc25* is a cell-  
486 cycle regulated protein. *Biochemical and biophysical research communications* 167, 301-309.
- 487 Engel, B.D., Schaffer, M., Kuhn Cuellar, L., Villa, E., Plitzko, J.M., and Baumeister, W. (2015).  
488 Native architecture of the *Chlamydomonas* chloroplast revealed by in situ cryo-electron  
489 tomography. *Elife* 4.
- 490 Fantes, P. (1979). Epistatic gene interactions in the control of division in fission yeast. *Nature*  
491 279, 428-430.
- 492 Fei, J., Torigoe, S.E., Brown, C.R., Khuong, M.T., Kassavetis, G.A., Boeger, H., and Kadonaga,  
493 J.T. (2015). The prenucleosome, a stable conformational isomer of the nucleosome. *Genes &*  
494 *development* 29, 2563-2575.
- 495 Flyamer, I.M., Gassler, J., Imakaev, M., Brandao, H.B., Ulianov, S.V., Abdennur, N., Razin,  
496 S.V., Mirny, L.A., and Tachibana-Konwalski, K. (2017). Single-nucleus Hi-C reveals unique  
497 chromatin reorganization at oocyte-to-zygote transition. *Nature* 544, 110-114.
- 498 Forsburg, S.L. (2003). Growth and manipulation of *S. pombe*. *Current Protocols in Molecular*  
499 *Biology*, 13.16. 11-13.16. 17.

- 500 Gan, L., Ladinsky, M.S., and Jensen, G.J. (2013). Chromatin in a marine picoeukaryote is a  
501 disordered assemblage of nucleosomes. *Chromosoma* 122, 377-386.
- 502 Gleizes, P.E., Noaillac-Depeyre, J., Leger-Silvestre, I., Teulieres, F., Dauxois, J.Y., Pommet, D.,  
503 Azum-Gelade, M.C., and Gas, N. (2001). Ultrastructural localization of rRNA shows defective  
504 nuclear export of preribosomes in mutants of the Nup82p complex. *The Journal of cell biology*  
505 155, 923-936.
- 506 Harlen, K.M., and Churchman, L.S. (2017). The code and beyond: transcription regulation by  
507 the RNA polymerase II carboxy-terminal domain. *Nature reviews Molecular cell biology* 18, 263-  
508 273.
- 509 Heumann, J.M. (2016). PEET (University of Colorado Boulder).
- 510 Heymann, J.B. (2001). Bsoft: image and molecular processing in electron microscopy. *Journal*  
511 *of structural biology* 133, 156-169.
- 512 Hihara, S., Pack, C.G., Kaizu, K., Tani, T., Hanafusa, T., Nozaki, T., Takemoto, S., Yoshimi, T.,  
513 Yokota, H., Imamoto, N., *et al.* (2012). Local nucleosome dynamics facilitate chromatin  
514 accessibility in living mammalian cells. *Cell reports* 2, 1645-1656.
- 515 Hirano, T. (2016). Condensin-Based Chromosome Organization from Bacteria to Vertebrates.  
516 *Cell* 164, 847-857.

- 517 Hiraoka, Y., Toda, T., and Yanagida, M. (1984). The NDA3 gene of fission yeast encodes beta-  
518 tubulin: a cold-sensitive *nda3* mutation reversibly blocks spindle formation and chromosome  
519 movement in mitosis. *Cell* 39, 349-358.
- 520 Khoshouei, M., Radjainia, M., Baumeister, W., and Danev, R. (2017). Cryo-EM structure of  
521 haemoglobin at 3.2 Å determined with the Volta phase plate. *Nature communications* 8, 16099.
- 522 Kimanius, D., Forsberg, B.O., Scheres, S.H., and Lindahl, E. (2016). Accelerated cryo-EM  
523 structure determination with parallelisation using GPUs in RELION-2. *Elife* 5.
- 524 Komarnitsky, P., Cho, E.J., and Buratowski, S. (2000). Different phosphorylated forms of RNA  
525 polymerase II and associated mRNA processing factors during transcription. *Genes &  
526 development* 14, 2452-2460.
- 527 Kubik, S., Bruzzone, M.J., Jacquet, P., Falcone, J.L., Rougemont, J., and Shore, D. (2015).  
528 Nucleosome Stability Distinguishes Two Different Promoter Types at All Protein-Coding Genes  
529 in Yeast. *Molecular cell* 60, 422-434.
- 530 Lantermann, A.B., Straub, T., Stralfors, A., Yuan, G.C., Ekwall, K., and Korber, P. (2010).  
531 *Schizosaccharomyces pombe* genome-wide nucleosome mapping reveals positioning  
532 mechanisms distinct from those of *Saccharomyces cerevisiae*. *Nat Struct Mol Biol* 17, 251-257.
- 533 Luger, K., Mader, A.W., Richmond, R.K., Sargent, D.F., and Richmond, T.J. (1997). Crystal  
534 structure of the nucleosome core particle at 2.8 Å resolution. *Nature* 389, 251-260.

- 535 Maeshima, K., and Eltsov, M. (2008). Packaging the genome: the structure of mitotic  
536 chromosomes. *J Biochem* *143*, 145-153.
- 537 Martinez-Balbas, M.A., Dey, A., Rabindran, S.K., Ozato, K., and Wu, C. (1995). Displacement of  
538 sequence-specific transcription factors from mitotic chromatin. *Cell* *83*, 29-38.
- 539 Mastronarde, D.N. (1997). Dual-axis tomography: an approach with alignment methods that  
540 preserve resolution. *Journal of structural biology* *120*, 343-352.
- 541 McGinty, R.K., and Tan, S. (2015). Nucleosome structure and function. *Chem Rev* *115*, 2255-  
542 2273.
- 543 Mizuguchi, T., Fudenberg, G., Mehta, S., Belton, J.M., Taneja, N., Folco, H.D., FitzGerald, P.,  
544 Dekker, J., Mirny, L., Barrowman, J., *et al.* (2014). Cohesin-dependent globules and  
545 heterochromatin shape 3D genome architecture in *S. pombe*. *Nature* *516*, 432-435.
- 546 Nagano, T., Lubling, Y., Stevens, T.J., Schoenfelder, S., Yaffe, E., Dean, W., Laue, E.D.,  
547 Tanay, A., and Fraser, P. (2013). Single-cell Hi-C reveals cell-to-cell variability in chromosome  
548 structure. *Nature* *502*, 59-64.
- 549 Nagano, T., Lubling, Y., Varnai, C., Dudley, C., Leung, W., Baran, Y., Mendelson Cohen, N.,  
550 Wingett, S., Fraser, P., and Tanay, A. (2017). Cell-cycle dynamics of chromosomal organization  
551 at single-cell resolution. *Nature* *547*, 61-67.

- 552 Nozaki, T., Imai, R., Tanbo, M., Nagashima, R., Tamura, S., Tani, T., Joti, Y., Tomita, M.,  
553 Hibino, K., Kanemaki, M.T., *et al.* (2017). Dynamic Organization of Chromatin Domains  
554 Revealed by Super-Resolution Live-Cell Imaging. *Molecular cell* 67, 282-293 e287.
- 555 Oesterreich, F.C., Herzel, L., Straube, K., Hujer, K., Howard, J., and Neugebauer, K.M. (2016).  
556 Splicing of Nascent RNA Coincides with Intron Exit from RNA Polymerase II. *Cell* 165, 372-381.
- 557 Oliva, A., Rosebrock, A., Ferrezuelo, F., Pyne, S., Chen, H., Skiena, S., Futcher, B., and  
558 Leatherwood, J. (2005). The cell cycle-regulated genes of *Schizosaccharomyces pombe*. *PLoS*  
559 *Biol* 3, e225.
- 560 Ou, H.D., Phan, S., Deerinck, T.J., Thor, A., Ellisman, M.H., and O'Shea, C.C. (2017).  
561 ChromEMT: Visualizing 3D chromatin structure and compaction in interphase and mitotic cells.  
562 *Science* 357.
- 563 Peng, X., Karuturi, R.K., Miller, L.D., Lin, K., Jia, Y., Kondu, P., Wang, L., Wong, L.S., Liu, E.T.,  
564 Balasubramanian, M.K., *et al.* (2005). Identification of cell cycle-regulated genes in fission yeast.  
565 *Molecular biology of the cell* 16, 1026-1042.
- 566 Pettersen, E.F., Goddard, T.D., Huang, C.C., Couch, G.S., Greenblatt, D.M., Meng, E.C., and  
567 Ferrin, T.E. (2004). UCSF Chimera--a visualization system for exploratory research and  
568 analysis. *J Comput Chem* 25, 1605-1612.
- 569 Pombo, A., and Dillon, N. (2015). Three-dimensional genome architecture: players and  
570 mechanisms. *Nature reviews Molecular cell biology* 16, 245-257.

- 571 Prescott, D.M., and Bender, M.A. (1962). Synthesis of RNA and protein during mitosis in  
572 mammalian tissue culture cells. *Exp Cell Res* 26, 260-268.
- 573 Rao, S.S., Huntley, M.H., Durand, N.C., Stamenova, E.K., Bochkov, I.D., Robinson, J.T.,  
574 Sanborn, A.L., Machol, I., Omer, A.D., Lander, E.S., *et al.* (2014). A 3D map of the human  
575 genome at kilobase resolution reveals principles of chromatin looping. *Cell* 159, 1665-1680.
- 576 Ricci, M.A., Manzo, C., Garcia-Parajo, M.F., Lakadamyali, M., and Cosma, M.P. (2015).  
577 Chromatin fibers are formed by heterogeneous groups of nucleosomes in vivo. *Cell* 160, 1145-  
578 1158.
- 579 Robinow, C.F., and Hyams, J.S. (1989). General Cytology of Fission Yeasts. In *Molecular*  
580 *biology of the fission yeast*, A. Nasim, P. Young, and B.F. Johnson, eds. (San Diego: Academic  
581 Press), pp. 273-330.
- 582 Rustici, G., Mata, J., Kivinen, K., Lio, P., Penkett, C.J., Burns, G., Hayles, J., Brazma, A., Nurse,  
583 P., and Bahler, J. (2004). Periodic gene expression program of the fission yeast cell cycle. *Nat*  
584 *Genet* 36, 809-817.
- 585 Scheres, S.H. (2012). RELION: implementation of a Bayesian approach to cryo-EM structure  
586 determination. *Journal of structural biology* 180, 519-530.
- 587 Struhl, K. (1998). Histone acetylation and transcriptional regulatory mechanisms. *Genes &*  
588 *development* 12, 599-606.

589 Taylor, J.H. (1960). Nucleic acid synthesis in relation to the cell division cycle. *Ann N Y Acad Sci*  
590 *90*, 409-421.

591 Toda, T., Yamamoto, M., and Yanagida, M. (1981). Sequential alterations in the nuclear  
592 chromatin region during mitosis of the fission yeast *Schizosaccharomyces pombe*: video  
593 fluorescence microscopy of synchronously growing wild-type and cold-sensitive *cdc* mutants by  
594 using a DNA-binding fluorescent probe. *J Cell Sci* *52*, 271-287.

595 Yakovlev, S., and Downing, K.H. (2011). Freezing in sealed capillaries for preparation of frozen  
596 hydrated sections. *J Microsc* *244*, 235-247.

597 Yam, C., Gu, Y., and Oliferenko, S. (2013). Partitioning and remodeling of the  
598 *Schizosaccharomyces japonicus* mitotic nucleus require chromosome tethers. *Current biology* :  
599 *CB* *23*, 2303-2310.

600

601 **MAIN FIGURES**

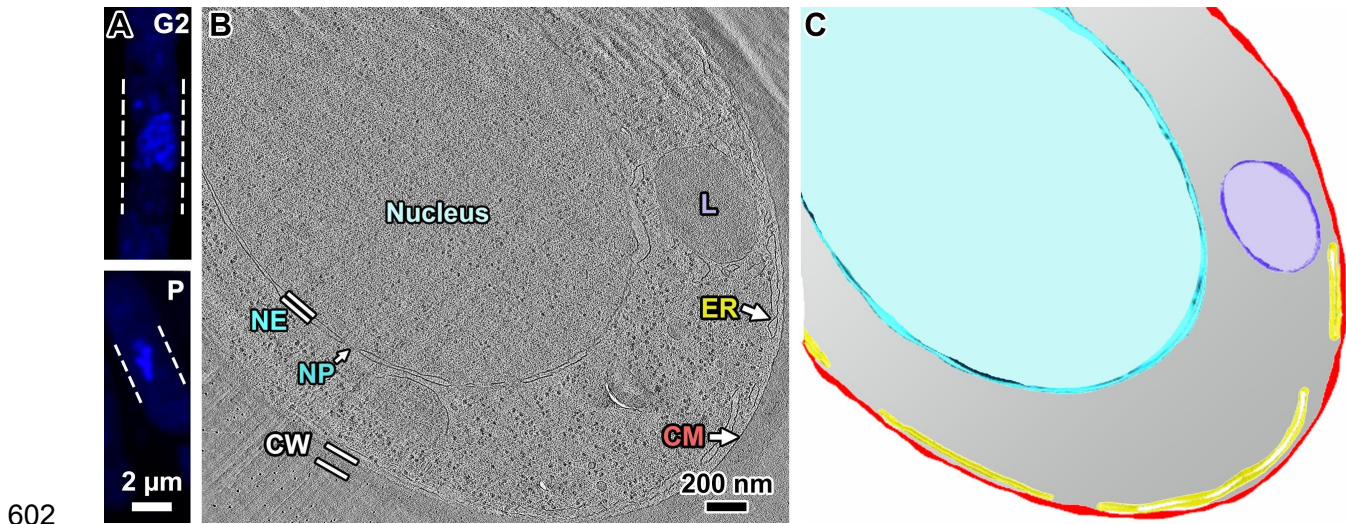

603 **Figure 1. Strategy to study chromosome condensation in *S. pombe*.**

604 (A) Fluorescence images of DAPI-stained G2-phase and prometaphase (P) cells.

605 Dashed lines indicate the cell boundaries. (B) Cryotomographic slice (25 nm) of a G2-

606 phase cell. NE: nuclear envelope; NP: nuclear pore complex; L: lipid body; ER:

607 endoplasmic reticulum; CM: cell membrane; CW: cell wall. The wavy features in the

608 upper portion of the cryotomogram are crevasses from sectioning; the thin parallel lines

609 running from 2 to 8 O'clock are knife marks. (C) Segmentation of the cryotomographic

610 slice in panel A, showing the cytoplasmic features with the same color scheme as the

611 text labels.



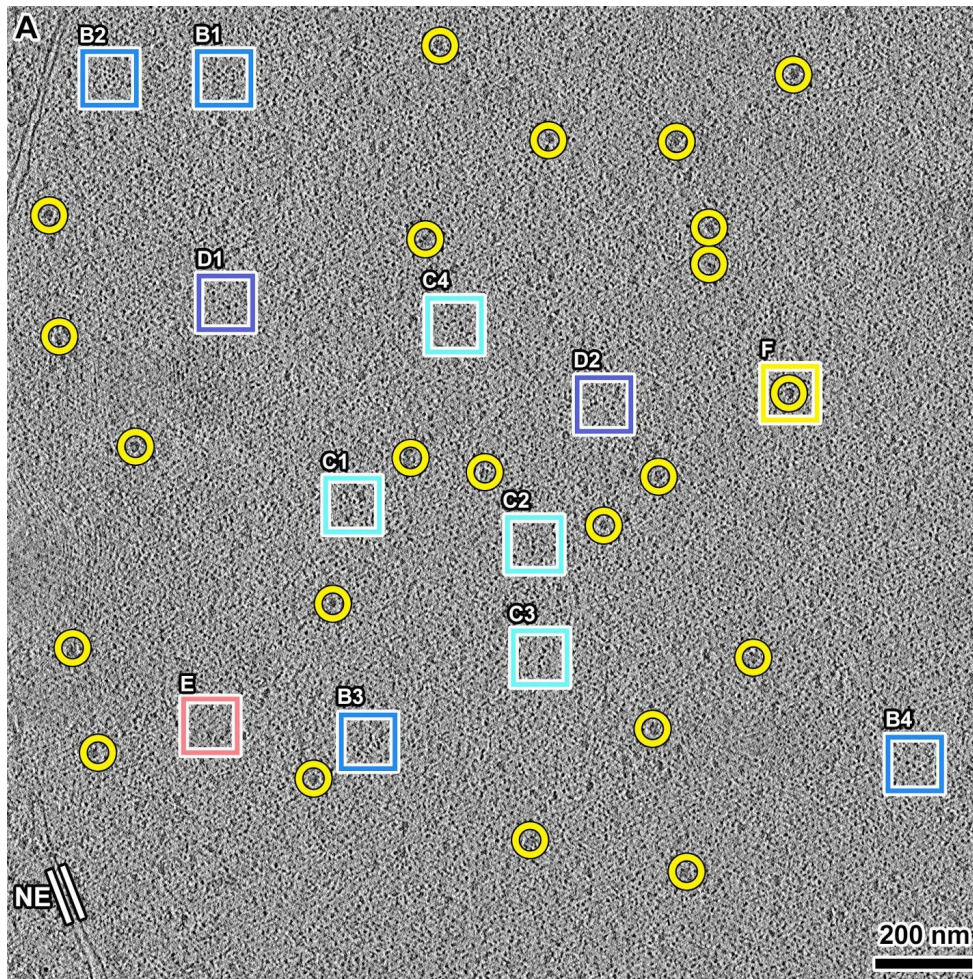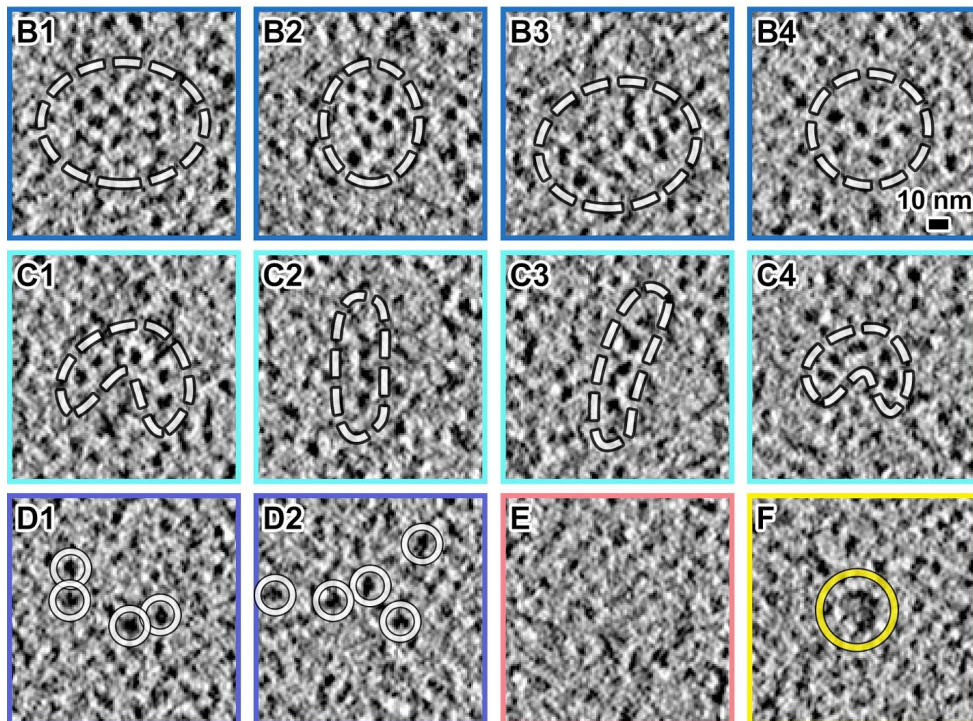

612

613 **Figure 2. G2-phase chromatin consists of nucleosomes with heterogeneous**  
614 **packing motifs and dispersed megacomplexes.**

615 (A) Cryotomographic slices (10 nm) of an interphase nucleus. Yellow circles: a subset of  
616 megacomplexes. (B1 - B4) Four examples of nucleosome clusters. (C1 - C4) Four  
617 examples of nucleosome chains. In panels B and C, the white dashed lines delineate  
618 the approximate boundaries of the nucleosome clusters. Due to their close packing and  
619 particulate nature, it is not possible to annotate the exact “outline” of a cluster. (D1 - D2)  
620 Two examples of loosely packed nucleosomes, which are circled. (E) An example  
621 position that has few nucleosomes. (F) An example megacomplex density.

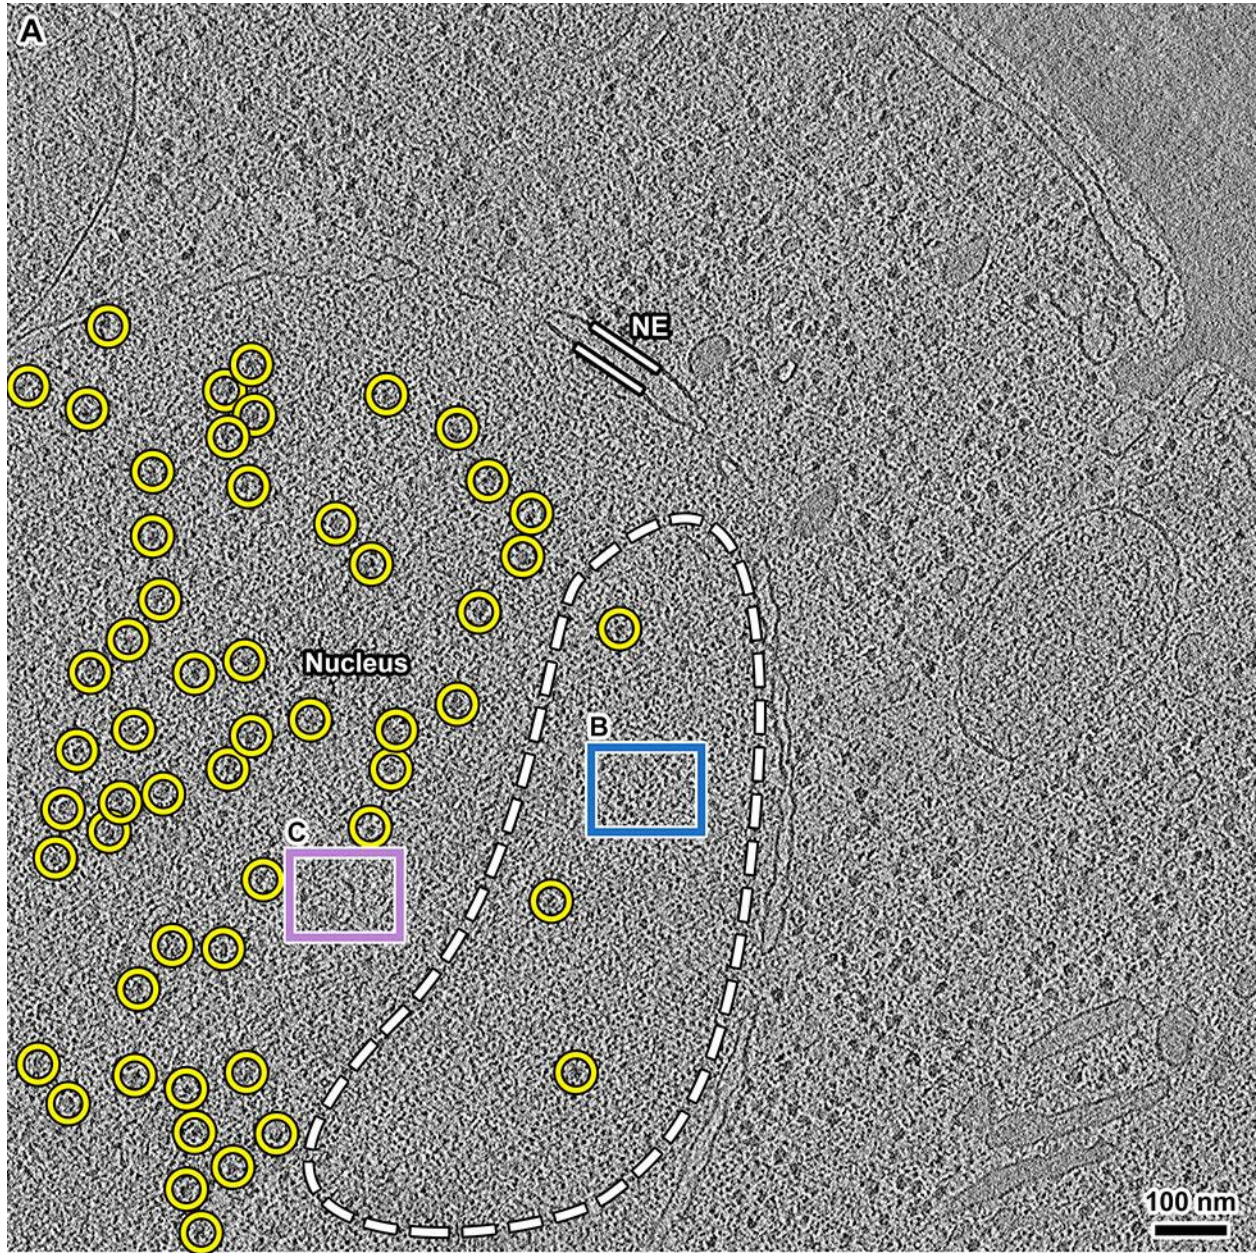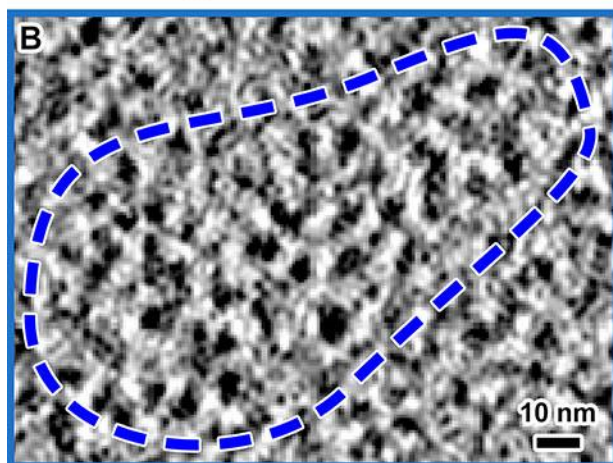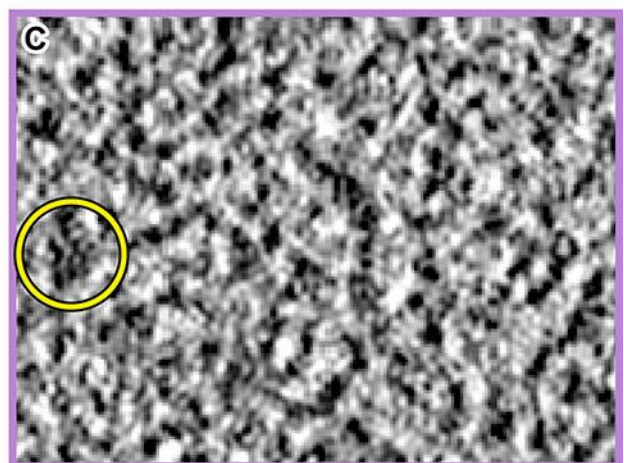

622

623 **Figure 3. Condensed mitotic chromosomes contain few large molecular**  
624 **complexes.**  
625 (A) Cryotomographic slice (11 nm) of a prometaphase cell. NE: nuclear envelope.  
626 Yellow circles: megacomplexes. The position circled with dashed line is a condensed  
627 chromosome. Rectangular boxes are enlarged 6-fold in panels B and C. (B) An example  
628 position with many nucleosome-like densities forming a cluster, circled with a dashed  
629 blue line. (C) A representative position without nucleosome-like densities. Yellow circle:  
630 a megacomplex.

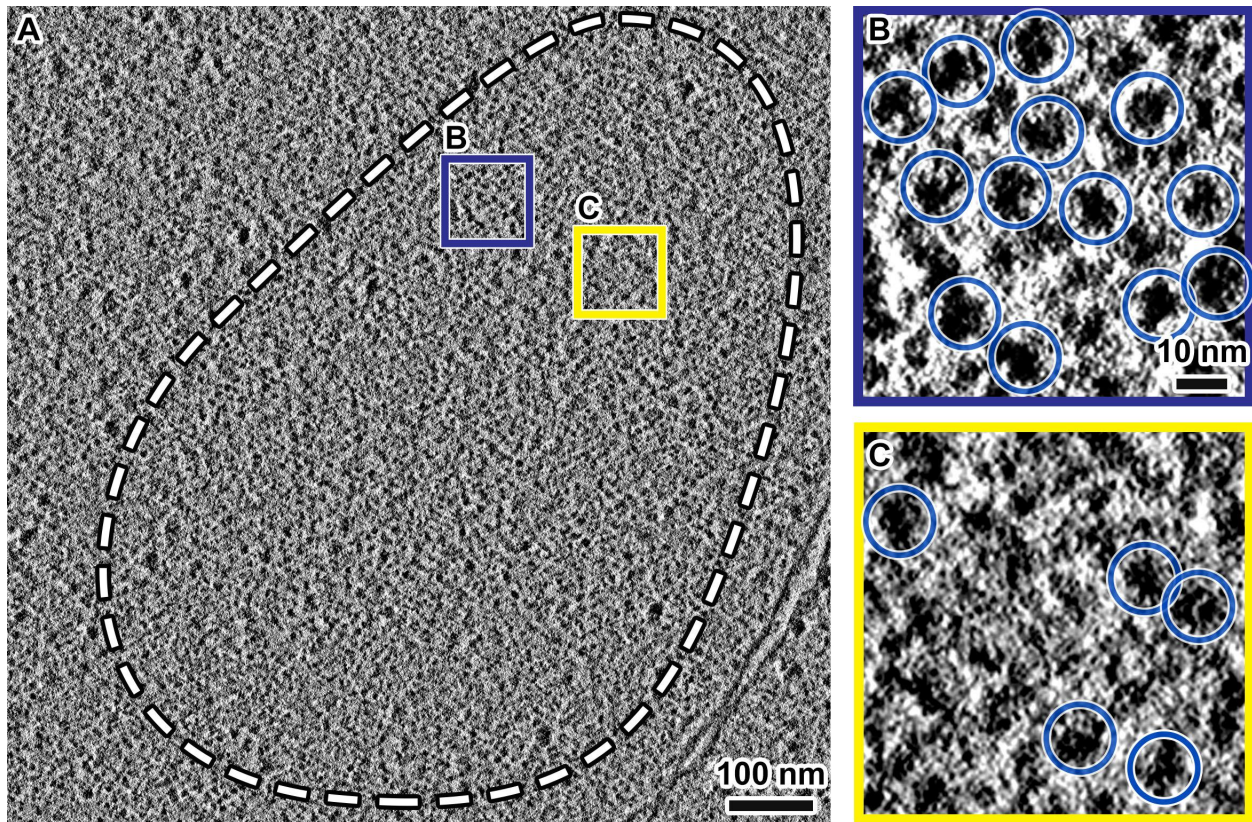

631

632 **Figure 4: Large nucleosome clusters and loosely packed nucleosomes coexist**  
633 **within mitotic condensed chromosomes**

634 (A) cryotomographic slice (11 nm) of a nucleus in a prometaphase cell, imaged with  
635 Volta phase contrast. White dashed line: approximate chromosome boundary, within  
636 which there are fewer megacomplexes. (B) Five-fold enlargement of a position within  
637 the mitotic chromosome that contains closely packed nucleosomes. (C) Five-fold  
638 enlargement of a position within the mitotic chromosome that contains fewer  
639 nucleosomes. Blue circles: nucleosomes.

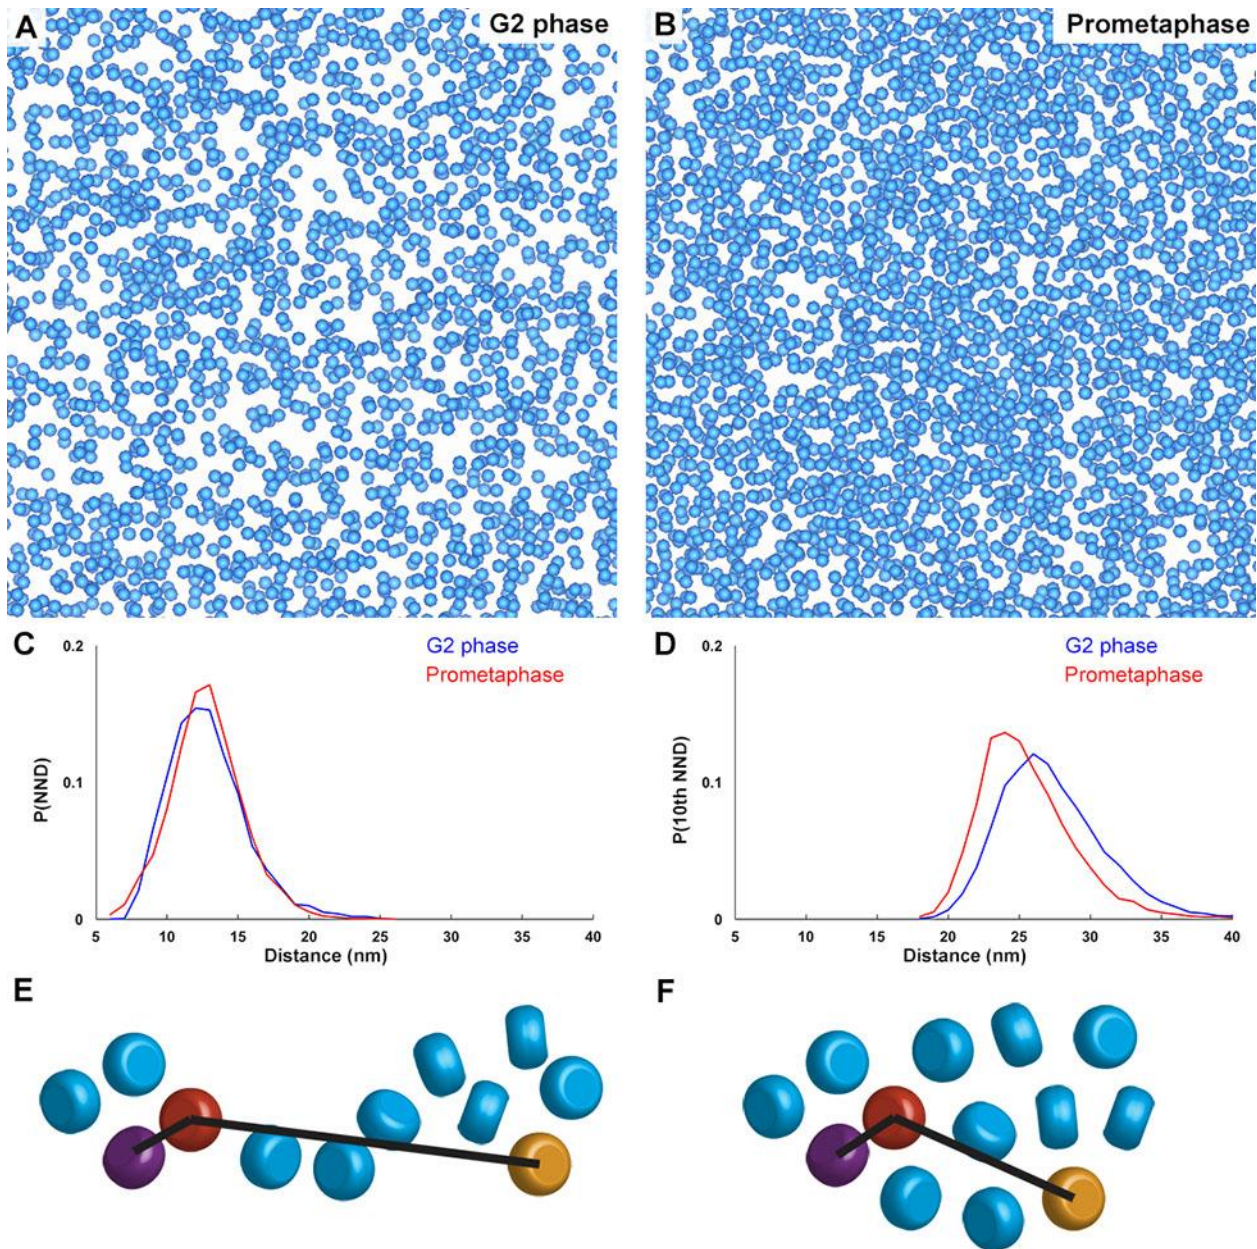

640

641 **Figure 5: Prometaphase clusters grow larger but have constant local packing**  
642 **density.**

643 (A and B) Template-matching hits of nucleosome positions (blue spheres) in Volta  
644 cryotomograms of (A) G2-phase and (B) prometaphase cells. (C) Nearest-neighbor  
645 distance (NND) analysis of template-matching hits. X-axis: NND, bin = 1 nm, Y-axis:  
646 normalized probability of each distance range. (D) Tenth NND analysis of template-

647 matching hits. The X- and Y- axes are the same as in panel C. (E, F) Cartoons showing  
648 how a small (E) and a large cluster (F) of nucleosomes (rounded cylinders) could have  
649 the same NND, but different 10<sup>th</sup> NND. In each panel, the purple and orange  
650 nucleosomes are the respective nearest and 10<sup>th</sup>-nearest neighbors of the red  
651 nucleosome.

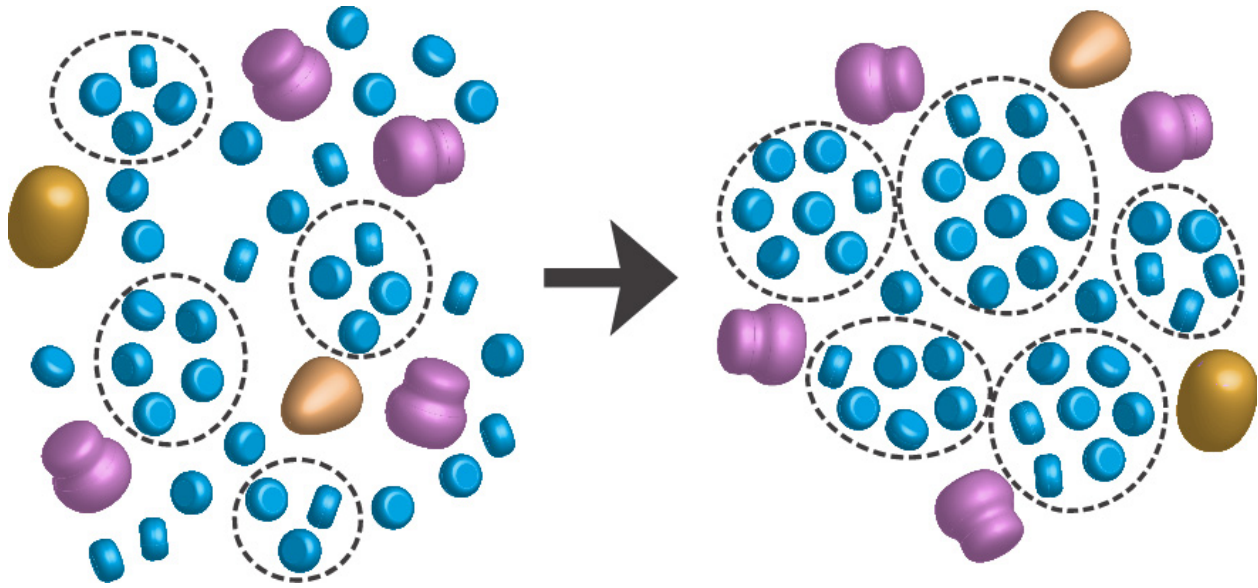

652

653 **Figure 6: Model for mitotic chromosome condensation.**

654 Interphase chromatin consists of both small nucleosome clusters and loosely packed  
655 nucleosomes. Blue: nucleosome; Gray: megastructures; dashed circles: nucleosome  
656 clusters. Note that this is a simplified model in which linker DNA is not shown. However,  
657 the absence of face-to-face interactions does reflect the results of 2-D classification.  
658 Megastructures (preribosomes, spliceosomes, transcription preinitiation complexes)  
659 are interspersed between the nucleosomes and nucleosome clusters. During mitotic  
660 chromosome condensation, most nucleosomes form larger clusters, thereby excluding  
661 or inhibiting the assembly of megastructures.
